# Supplementary material
Source: Springer Nature journal article supplement (https://www.springermedizin.de/resource/supplementary/12981_2011_196_MOESM4_ESM.pdf/9604026)
Supplement: MOESM4 [file 9604026]

**Table 2. Study population characteristics.**

| <b>HIV-infected group</b> | <b>Age (yrs)<sup>1</sup></b> | <b>Gender (M/F)</b> | <b>CD4 count<sup>1, 2</sup></b> | <b>CD8 count<sup>1,2</sup></b> | <b>Log<sub>10</sub> VL<sup>1</sup></b> | <b>Duration of infection (yrs)<sup>1</sup></b> |
|---------------------------|------------------------------|---------------------|---------------------------------|--------------------------------|----------------------------------------|------------------------------------------------|
| EC (n=34)                 | 40<br>(30-68)                | 19/8                | 755<br>(310-1488)               | 696<br>(202-1286)              | 1.70<br>(1.70-1.70)                    | 12.17<br>(1-20)                                |
| Progressors (n=24)        | 36<br>(24-52)                | 22/3                | 314<br>(191-480)                | 710<br>(113-2260)              | 4.29<br>(2.51-5.91)                    | 2<br>(2-12)                                    |

M=Male, F=Female, EC=Elite Controllers

<sup>1</sup>= Median (range)

<sup>2</sup>=cells/mm<sup>3</sup>
